# Supplementary figures and images for: Human fibroblast-macrophage tissue spheroids demonstrate ratio-dependent fibrotic activity for in vitro fibrogenesis model development
Source: Royal Society of Chemistry journal article supplement (doi:10.1039/c9bm00900k), 2020-01-01

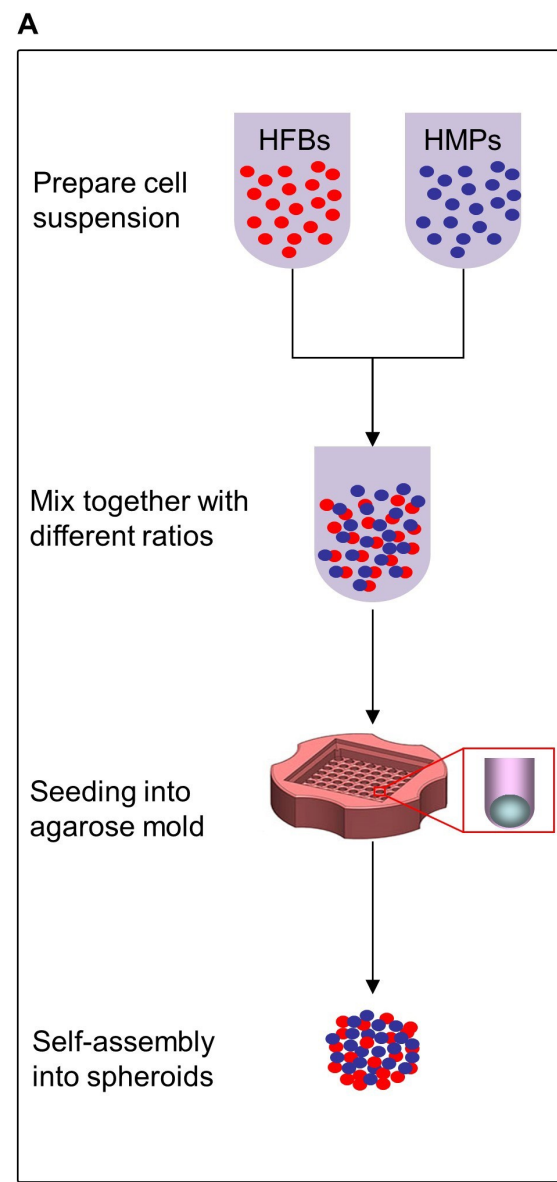

Supplement: c9bm00900k2.pdf [file c9bm00900k2.pdf]

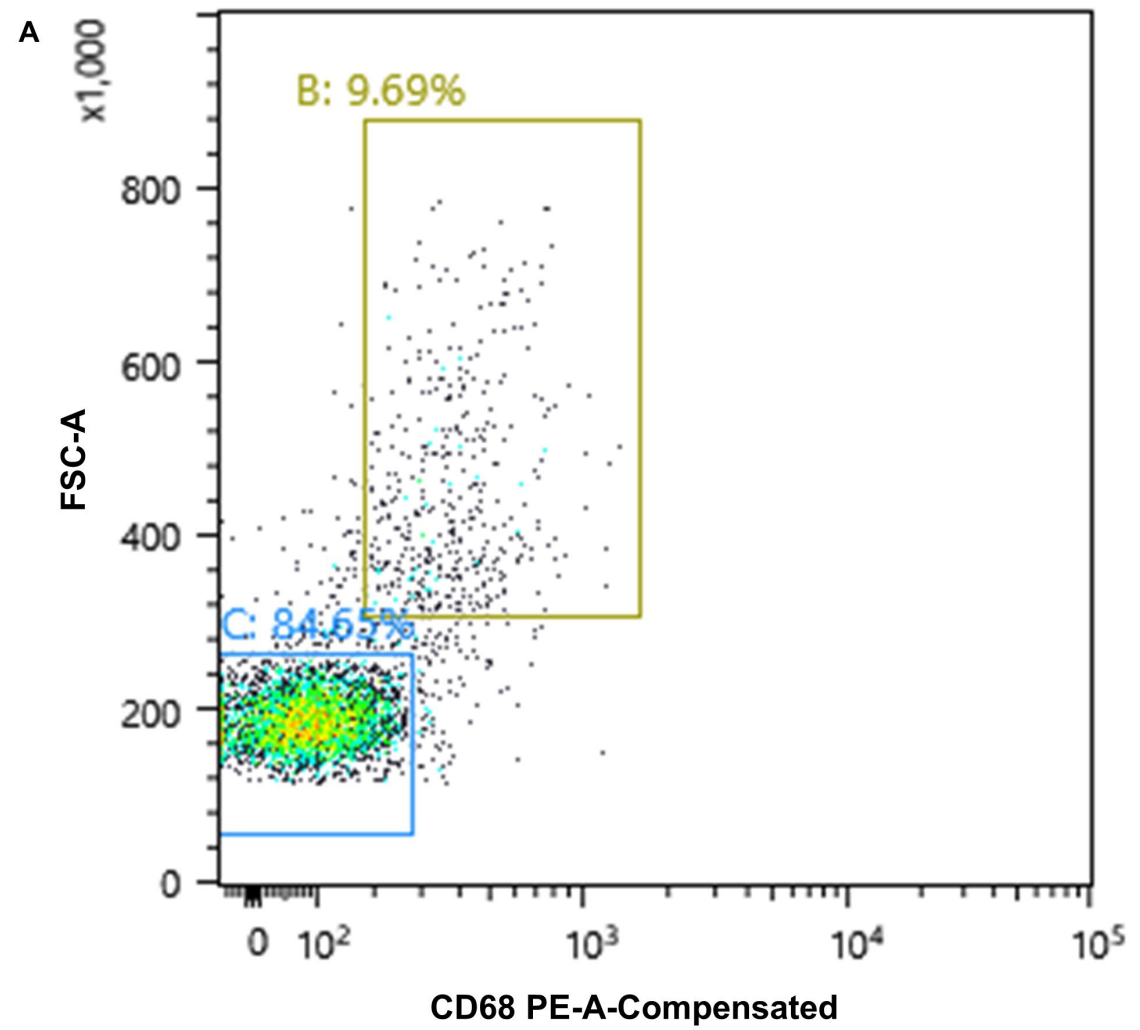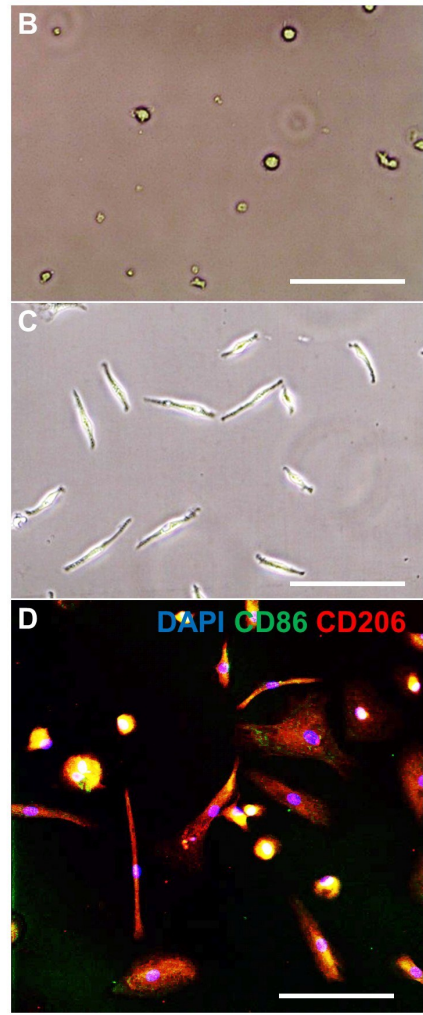

Supplement: c9bm00900k3.pdf [file c9bm00900k3.pdf]

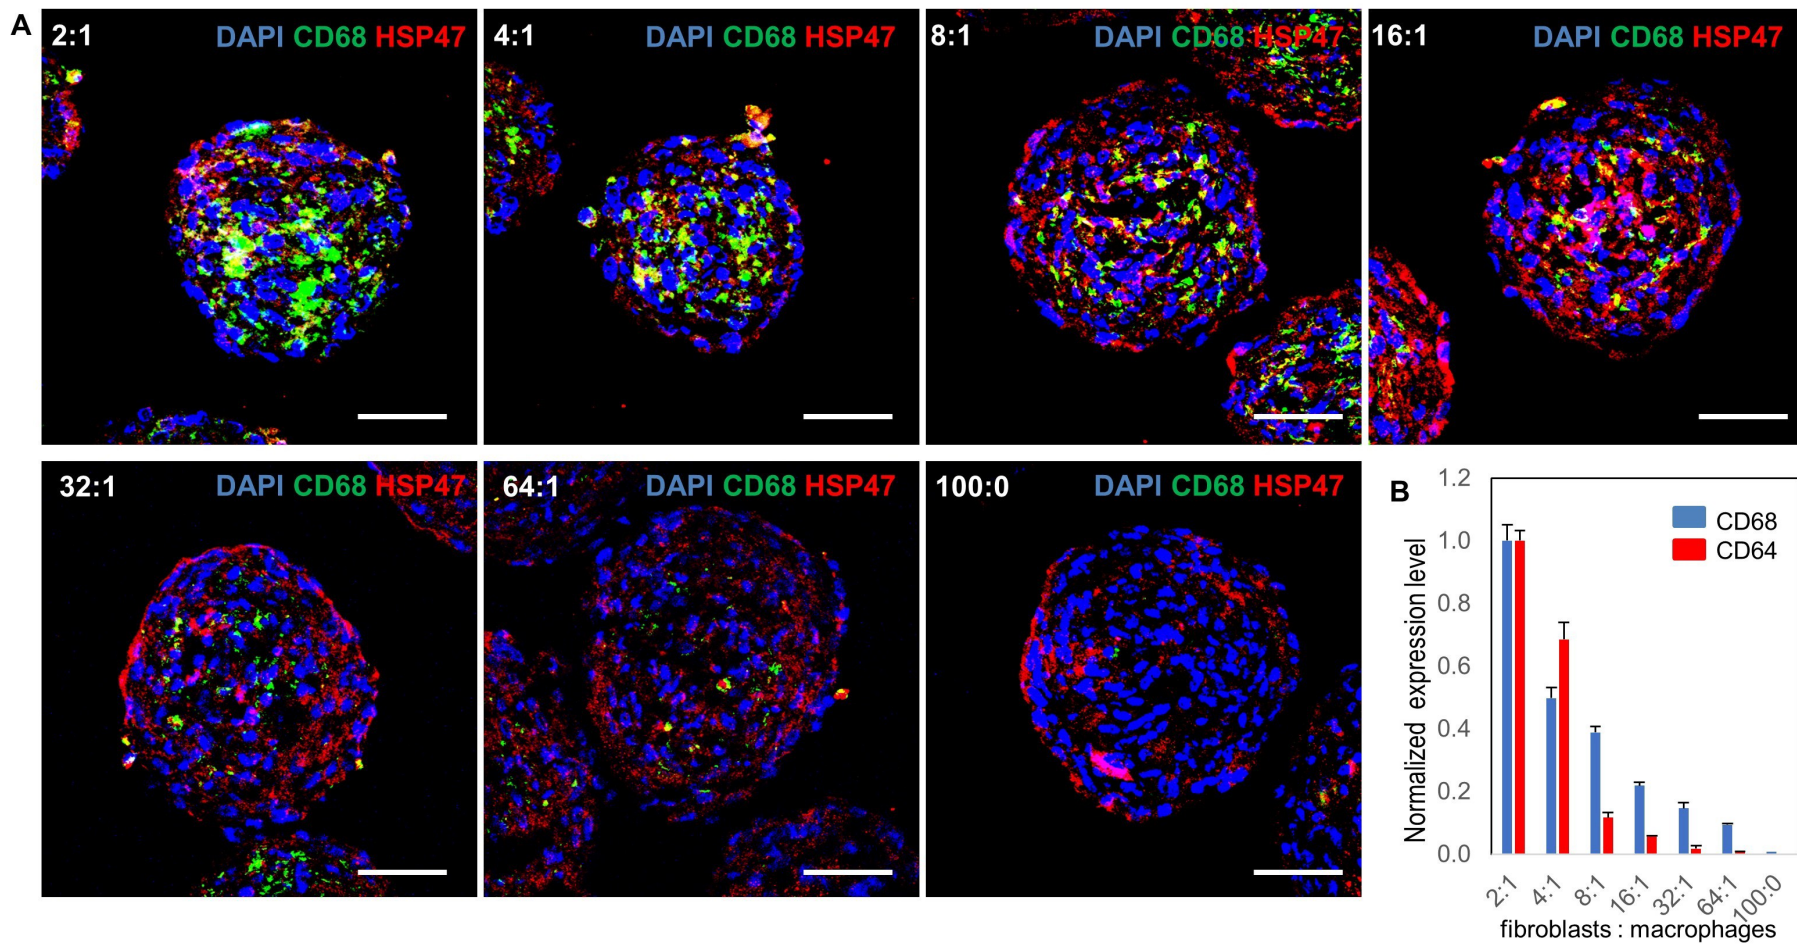

Supplement: c9bm00900k5.pdf [file c9bm00900k5.pdf]

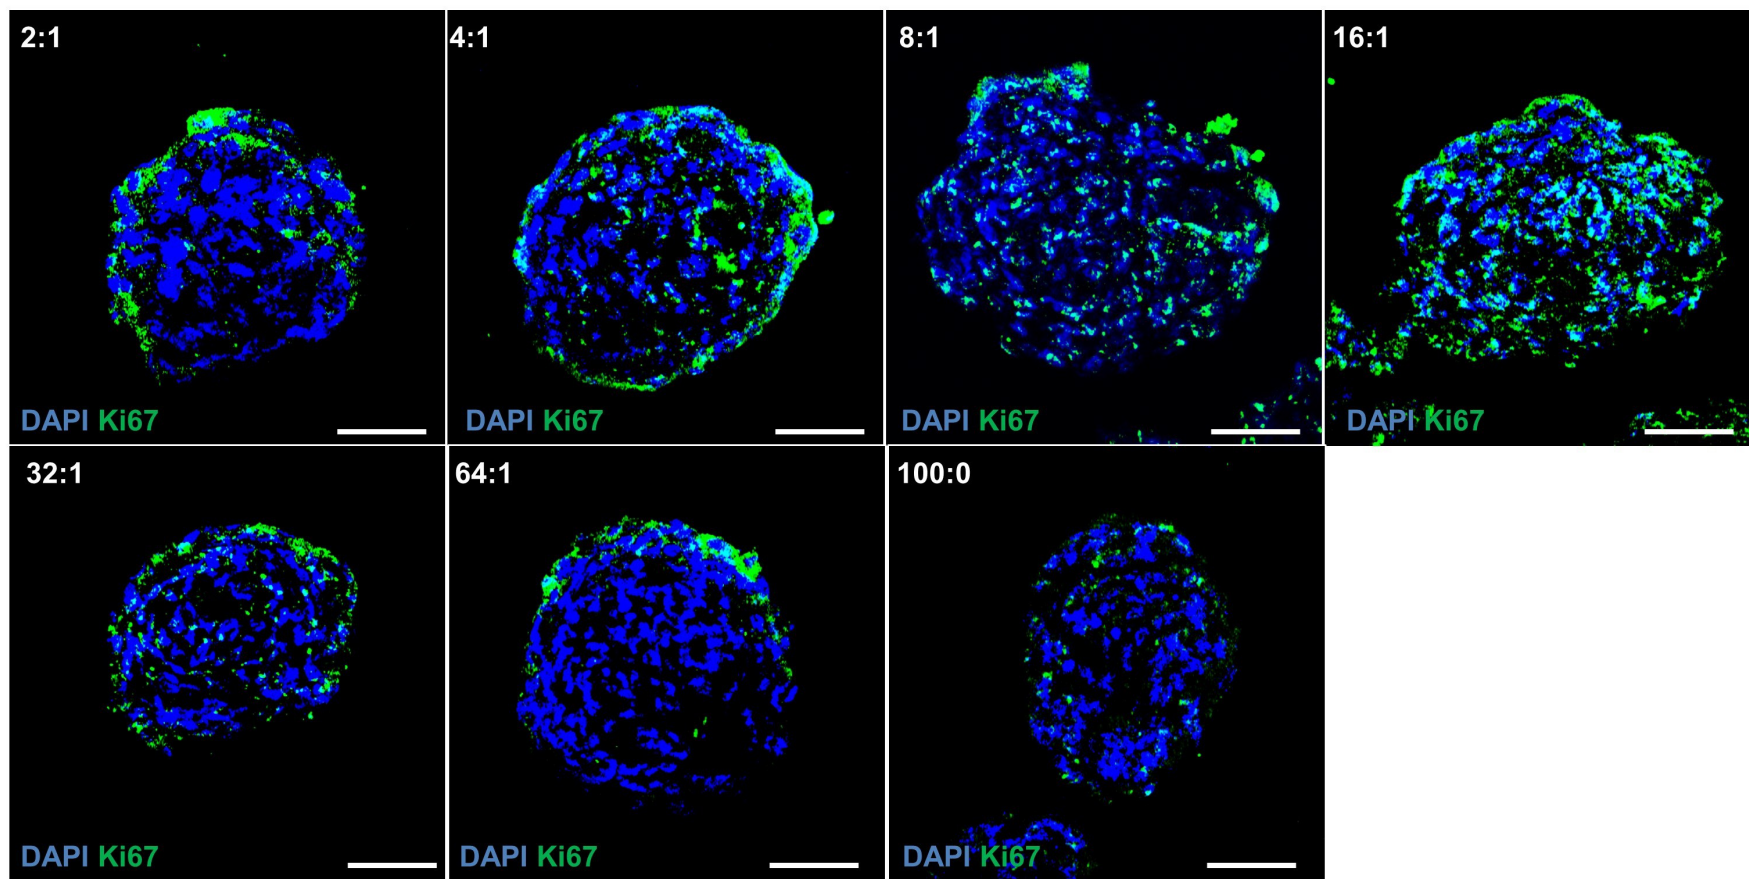

Supplement: c9bm00900k6.pdf [file c9bm00900k6.pdf]
